# 1 **The virucidal effects of 405 nm visible light on SARS-CoV-2 and influenza A virus**

2 Raveen Rathnasinghe<sup>1,2,3</sup>, Sonia Jangra<sup>1,2</sup>, Lisa Miorin<sup>1,2</sup>, Michael Schotsasert<sup>1,2</sup>, Clifford

3 Yahnke<sup>6#</sup>, Adolfo García-Sastre<sup>1,2,4,5#1</sup>

4 <sup>1</sup>Department of Microbiology, Icahn School of Medicine at Mount Sinai, New York, NY 10029, USA

5 <sup>2</sup>Global Health and Emerging Pathogens Institute, Icahn School of Medicine at Mount Sinai, New York,  
6 NY 10029, USA

7 <sup>3</sup>Graduate School of Biomedical Sciences, Icahn School of Medicine at Mount Sinai, New York, NY  
8 10029, USA

9 <sup>4</sup>Department of Medicine, Division of Infectious Diseases, Icahn School of Medicine at Mount Sinai, New  
10 York, NY 10029, USA

11 <sup>5</sup>The Tisch Cancer Institute, Icahn School of Medicine at Mount Sinai, New York, NY 10029, USA

12 <sup>6</sup> Kenall Manufacturing, Kenosha, WI 53144

13 #Correspondence: [cliff.yahnke@kenall.com](mailto:cliff.yahnke@kenall.com) , [adolfo.garcia-sastre@mssm.edu](mailto:adolfo.garcia-sastre@mssm.edu)

14

15

## 16 **Abstract**

17 Germicidal potential of specific wavelengths within the electromagnetic spectrum is an  
18 area of growing interest. While ultra-violet (UV) based technologies have shown  
19 satisfactory virucidal potential, the photo-toxicity in humans coupled with UV associated  
20 polymer degradation limit its use in occupied spaces. Alternatively, longer wavelengths  
21 with less irradiation energy such as visible light (405 nm) have largely been explored in  
22 the context of bactericidal and fungicidal applications. Such studies indicated that 405  
23 nm mediated inactivation is caused by the absorbance of porphyrins within the  
24 organism creating reactive oxygen species which result in free radical damage to its  
25 DNA and disruption of cellular functions. The virucidal potential of visible-light based  
26 technologies has been largely unexplored and speculated to be ineffective given the  
27 lack of porphyrins in viruses. The current study demonstrated increased susceptibility of  
28 lipid-enveloped respiratory pathogens of importance such as SARS-CoV-2 (causative  
29 agent of COVID-19) as well as the influenza A virus to 405nm, visible light in the

30 absence of exogenous photosensitizers indicating a potential porphyrin-independent  
31 alternative mechanism of visible light mediated viral inactivation. These results were  
32 obtained using less than expected irradiance levels which are generally safe for humans  
33 and commercially achievable. Our results support further exploration of the use of  
34 visible light technology for the application of continuous decontamination in occupied  
35 areas within hospitals and/or infectious disease laboratories, specifically for the  
36 inactivation of respiratory pathogens such as SARS-CoV-2 and Influenza A.

37 **Key words – Visible light, 405nm, Virucidal, SARS-CoV-2, Influenza, inactivation**

38

39

40

41

42

43

44

45

46

47

48

49

50

51

52

## 53 **Introduction**

54 The severe-acute respiratory syndrome corona virus 2 (SARS-CoV-2), the causative  
55 agent of the COVID-19 pandemic, is a member of the beta-coronavirus family and it  
56 emerged at the end of 2019 in the Hubei province in Wuhan China<sup>1</sup>. By late February  
57 2021, more than 112 million cases had been reported while accounting for  
58 approximately 2.5 million deaths, underscoring the rapid dissemination of the virus on a  
59 global scale<sup>2</sup>. As a complement to standard precautions such as handwashing,  
60 masking, surface disinfection, and social distancing, other enhancements to enclosed  
61 spaces such as improved ventilation and whole-room disinfection are being considered  
62 by segments beyond acute healthcare such as retail, dining, and transportation<sup>3</sup>.

63 Initial guidance from health authorities such as the CDC and WHO on environmental  
64 transmission focused on contaminated surfaces as fomites<sup>4</sup>. Data pertaining to the  
65 survival of SARS-CoV-2 and other related coronaviruses to date has indicated that  
66 virions are able to persist on fomites composed of plastic<sup>5</sup>, wood<sup>6</sup>, paper<sup>5</sup>, metal<sup>7</sup> and  
67 glass<sup>8</sup> potentially up to nine days. Recent studies have suggested that SARS-CoV-2  
68 may also remain viable approximately at least three days in such surfaces and another  
69 two studies showed that at room temperature (20-25°C), a 14-day time-period was  
70 required to see a 4.5-5 Log<sub>10</sub> of the virus<sup>9, 10</sup>.

71 Since the start of the pandemic, transmission of the virus by respiratory droplets and  
72 aerosols has become an accepted method of transmission although the relative impact  
73 of each mode of transmission is the subject of much debate. Nevertheless, enclosed  
74 spaces with groups of people exercising or singing have been associated with

75 increased transmission. The half-life survival of SARS-CoV-2 in this type of environment  
76 has been estimated between 1-2 hours<sup>6, 11, 12</sup>.

77 Taking this information into consideration, several methods have been evaluated to  
78 effectively inactivate SARS-CoV-2. Chemical methods, which focus on surface  
79 disinfection, utilize 70% alcohol and bleach and their benefits are well established.  
80 These methods are also episodic (or non-continuous) meaning that in-between  
81 applications, the environment is not being treated<sup>13</sup>.

82 In addition to chemicals, one of the most utilized methods for whole-room disinfection is  
83 germicidal ultra-violet C (UVC; ~254 nm)<sup>14</sup>. This technology is well established<sup>15</sup> and  
84 has been shown to inactivate a range of pathogens including bacteria<sup>16</sup>, fungi<sup>17</sup> and  
85 viruses<sup>18</sup>. The mechanism of action of UVC is photodimerization of genetic material  
86 such as RNA (relevant for SARS-CoV2 and IAV) and DNA (relevant for DNA viruses  
87 and bacterial pathogens, among others)<sup>19</sup>. Unfortunately, this effect has been  
88 associated with deleterious effects in exposed humans such as photokeratoconjunctivitis  
89 in eyes and photodermatitis in skin<sup>20</sup>. For these reasons, UVC irradiation requires safety  
90 precautions and cannot be used to decontaminate fomites and high contact areas in the  
91 presence of humans<sup>21</sup>.

92 Germicidal properties of violet-blue visible light (380-500 nm), especially within the  
93 range of 405 to 450 nm wavelengths have been appreciated as an alternative to UVC  
94 irradiation in whole-room disinfection scenarios where it has shown reduction of  
95 bacteria<sup>22, 23</sup> in occupied rooms and reductions in surgical site infections<sup>24</sup>. Although 405  
96 nm or closely related wavelengths have been shown to be less germicidal than UVC, its  
97 inactivation potential has been assessed in pathogenic bacteria such as *Listeria* spp

98 and *Clostridium* spp<sup>24, 25</sup>, and in fungal species such as *Saccharomyces* spp and  
99 *Candida* spp<sup>26</sup> . It is thought that the underlying mechanism of blue-light mediated  
100 inactivation is associated with absorption of light via photosensitizers such as  
101 porphyrins which results in the release of reactive oxygen species (ROS) <sup>27, 28</sup>. The  
102 emergence of ROS is associated with direct damage to biomolecules such as proteins,  
103 lipids and nucleic acids which are essential constituents of bacteria, fungi and viruses.  
104 Further studies have shown that ROS can also lead to the loss of cell membrane  
105 permeability mediated by lipid oxidation<sup>29</sup>. Given the lack of endogenous  
106 photosensitizers such as porphyrins in virions, efficient decontamination of viruses (both  
107 enveloped and non-enveloped) may require the addition of exogenous  
108 photosensitizers<sup>23</sup>. With the use of media suspensions containing both endogenous  
109 and/or exogenous photosensitizers, inactivation of viruses such as feline calicivirus  
110 (FCV)<sup>30</sup>, viral hemorrhagic septicemia virus (VHSV)<sup>31</sup> and murine norovirus-1<sup>32</sup> has  
111 demonstrated the virucidal potency of 405 nm visible light using porphyrin rich media  
112 such as saliva, blood, etc. (to create the ROS required for inactivation) using unsafe,  
113 commercially impractical irradiance levels. This highlights the importance of answering  
114 the basic scientific questions related to viral inactivation within the context of the applied  
115 science required for clinical application. Our study specifically focused on three  
116 questions: 1) does the same wavelength of light (405nm) that inactivates bacteria also  
117 inactivate enveloped viruses, 2) is a porphyrin rich medium required for this inactivation,  
118 and 3) can this inactivation be achieved using safe, commercially practical irradiance  
119 levels?

120 In the current study, we show the impact of 405 nm irradiation on inactivation of SARS-  
121 CoV-2 and influenza A H1N1 viruses without the use of photosensitizers making it  
122 directly relevant to the clinical environment. We show this using a commercially  
123 available visible light disinfection system ensuring that the irradiance used is both safe  
124 and practically achievable in a clinical setting supporting the possible use of 405 nm  
125 irradiation as a tool to confer continuous decontamination of respiratory pathogens such  
126 as SARS-CoV-2 and influenza A viruses. We further show the increased susceptibility  
127 of lipid-enveloped viruses for irradiation in comparison to non-enveloped viruses, further  
128 characterizing the virucidal effects of visible light.

## 129 **Materials and methods.**

### 130 **405 nm Exposure System**

131 The visible light disinfection product used in this study was a commercially available 6”  
132 LED downlight (Indigo-Clean, Kenall, Kenosha, WI) to allow for use within a BSL-3 level  
133 containment hood. Within the hood, the distance between the face of the fixture and the  
134 sample was 10”- much less than the normal 1.5 m used in normal, whole-room  
135 disinfection applications. The output of the fixture was modified electronically during its  
136 manufacture to match this difference and ensure that the measurements would  
137 represent the performance of the device in actual use. This test setup is shown in a  
138 BSL-2 hood in Figure 1 below. Note the spectroradiometer and the bottom portion of the  
139 rig (~6”) used for calibration were removed during the actual study.

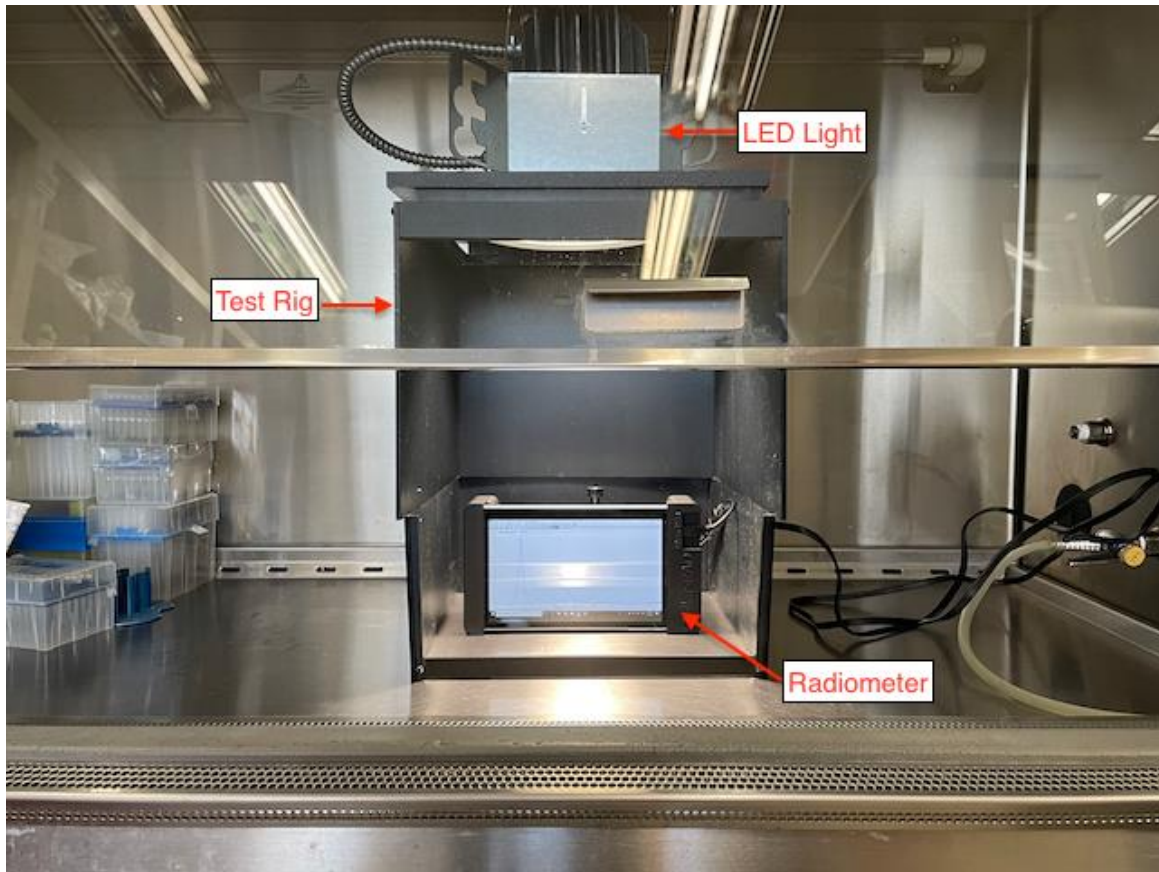

140

141 **Figure 1. Test setup shown with spectroradiometer and extension used for**  
142 **calibration.**

143

144 Controls were placed outside the test rig but within the BSL hood as shown in Figure 2.

145 Note that this picture contains the bottom portion of the test rig to highlight the position  
146 of the radiometer

147

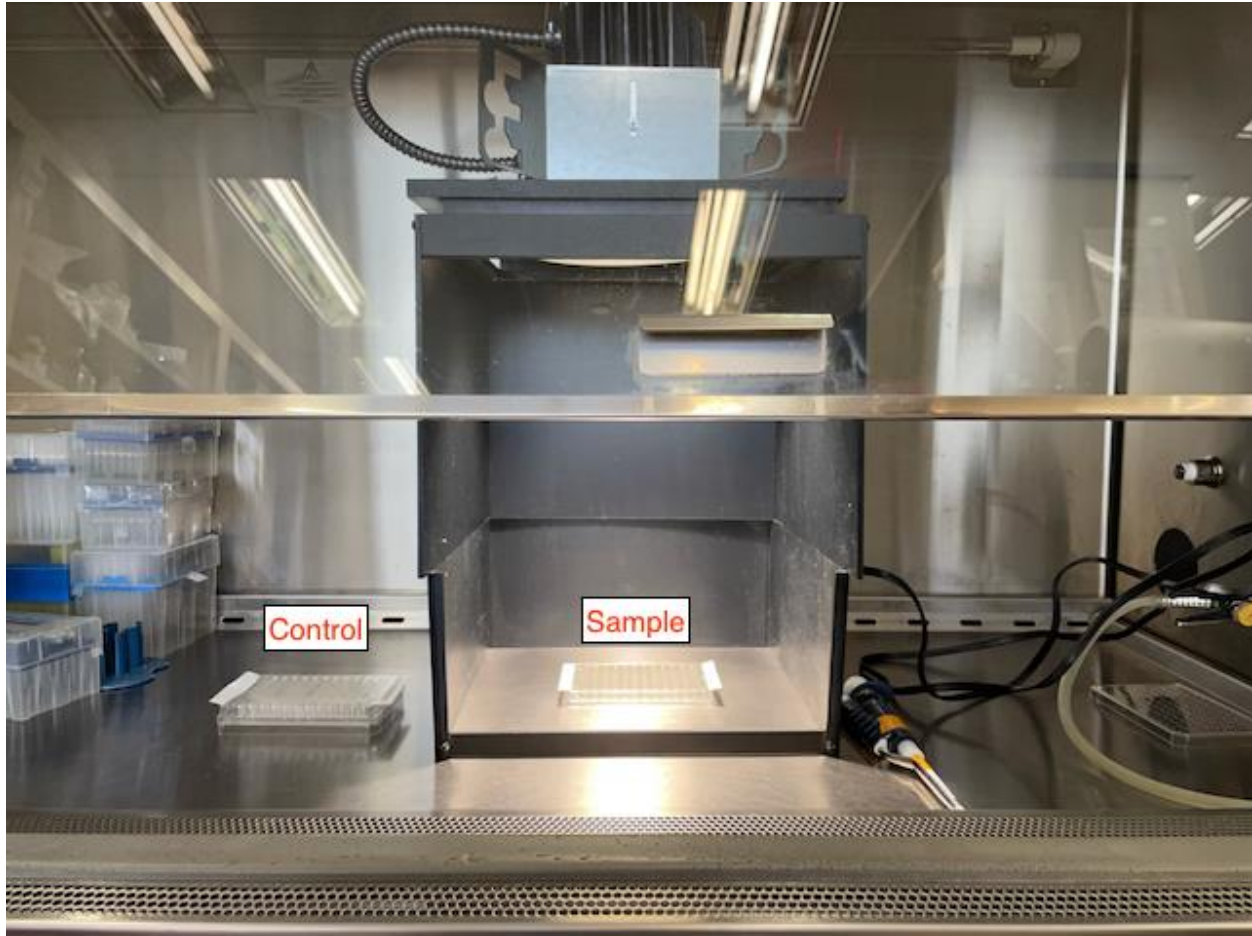

148

149 **Figure 2. Test setup showing the placement of the control and sample for**  
150 **irradiation. Note that the bottom portion of the test rig was removed during the**  
151 **actual experiment. This ensures the 10” distance used in the study.**

152

153 For the range of output used in this study, multiple discrete levels were created using  
154 pulse width modulation within the LED driver itself. These levels were made to be  
155 individually selectable using a simple knob on the attached control module.

156 As expected, the amount of visible light within the 400nm-420nm bandwidth, measured  
157 in  $\text{mWcm}^{-2}$ , is a measurement of the “dose” delivered to the target organism and is used  
158 to quantify this relationship similar to that used in UV disinfection applications.



159 To fully examine this effect, a range of irradiance values were used representing actual  
160 product deployment conditions in occupied rooms. The lowest value ( $0.035 \text{ mWcm}^{-2}$ )  
161 represents a single-mode, lower wattage used in general lighting applications while the  
162 highest value ( $0.6 \text{ mWcm}^{-2}$ ) represents a dual-mode, higher wattage used in critical care  
163 applications such as an operating room.

164 The device was placed in a rig to ensure a consistent distance (10") between the fixture  
165 and the samples. The output of the fixture in the test rig was measured using a Stellar-  
166 RAD Radiometer from StellarNet configured to make wavelength and irradiance  
167 measurements from 350nm-1100nm with  $< 1\text{nm}$  spectral bandwidth using a NIST  
168 traceable calibration. To ensure that the regular white light portion of the illumination  
169 (which is non-disinfecting) was not measured, the measurement was electronically  
170 limited to a 1nm bandwidth over the 400nm-420nm range. The normalized spectral  
171 profile is shown in Fig. 3 below. The absolute value of the measurement was  
172 determined using a NIST traceable calibration as previously described.

173

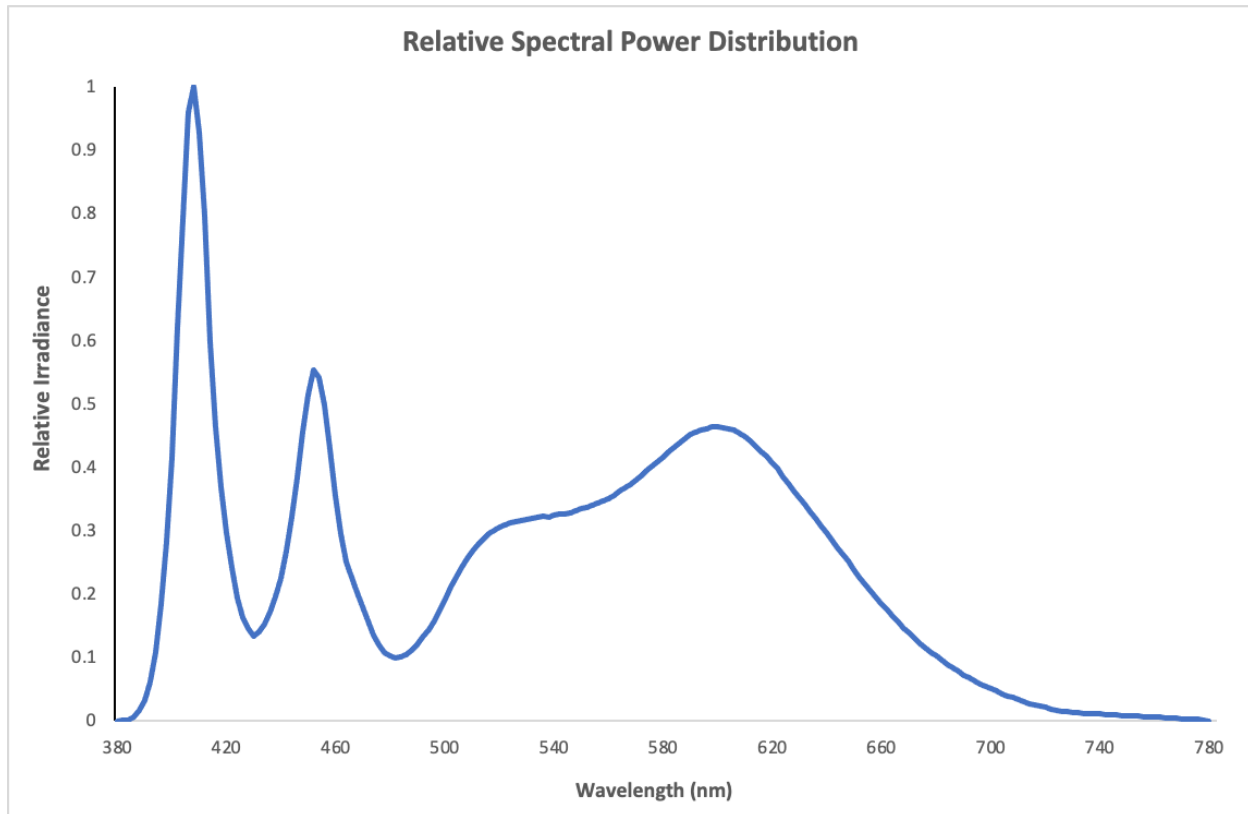

174

175 **Figure 3. Normalized spectral power distribution showing peak irradiance at**  
176 **405nm.**

177 Samples were irradiated with the range of wavelengths depicted in Figure 3. This was  
178 deliberately done for two reasons: 1) prior work had shown that visible light disinfection  
179 was primarily active at 405nm<sup>33</sup> and 2) to emphasize the applied science associated  
180 with actual clinical use where a virus in the environment could be exposed to both  
181 405nm and regular white light in an occupied room.

182 To isolate the contribution of 405nm light, the control samples were placed outside the  
183 field of irradiation created by the disinfection product but within the biosafety hood.  
184 Accordingly, these samples were exposed to the overhead lights within the room which  
185 contained virtually no 405nm light (< 0.001 mWcm<sup>-2</sup>).

186 In any assessment of viral inactivation, thermal denaturing of the organism is a concern.  
187 Older lighting technologies such as incandescent sources heat a resistive element and  
188 were widely used in a variety of applications. This creates heat at both the source and  
189 to objects within its field. Fortunately, the disinfecting light (sample) and the overhead  
190 lights in the room (control) did not use this technology and therefore contain no infrared  
191 emissions ( $> 800 \text{ nm}$ ) a commonly known benefit associated with LED lighting. As a  
192 confirmation, the temperature beneath the disinfecting light was measured using a  
193 commercially available thermocouple during a 24-hour period. During this time, the  
194 temperature at the sample position was constant at  $20^{\circ}\text{C} \pm 0.5^{\circ}\text{C}$ . even at the highest  
195 disinfecting power ( $0.6 \text{ mWcm}^{-2}$ ).

196  
197 For reference, two spectral profiles, one for traditional fluorescent lighting and the other  
198 for standard LED lighting are provided in Figure 4 below. While both types of lighting  
199 are commonly used in the overhead lights within buildings, the lights in the BSL-3  
200 laboratory were traditional fluorescent. As shown in Figure 2, the controls were  
201 exposed only to traditional fluorescent lighting with a negligible amount of disinfecting  
202 light ( $< 0.001 \text{ mWcm}^{-2}$ ) between  $400\text{nm}$  and  $420\text{nm}$ . Due to the inherent differences  
203 between fluorescent and LED lighting, the standard LED spectra has a small, but  
204 measurable amount of disinfecting light ( $0.006 \text{ mWcm}^{-2}$ ) between  $400\text{nm}$  and  $420\text{nm}$ .  
205 As will be later shown, this amount of light can have a measurable disinfecting effect.

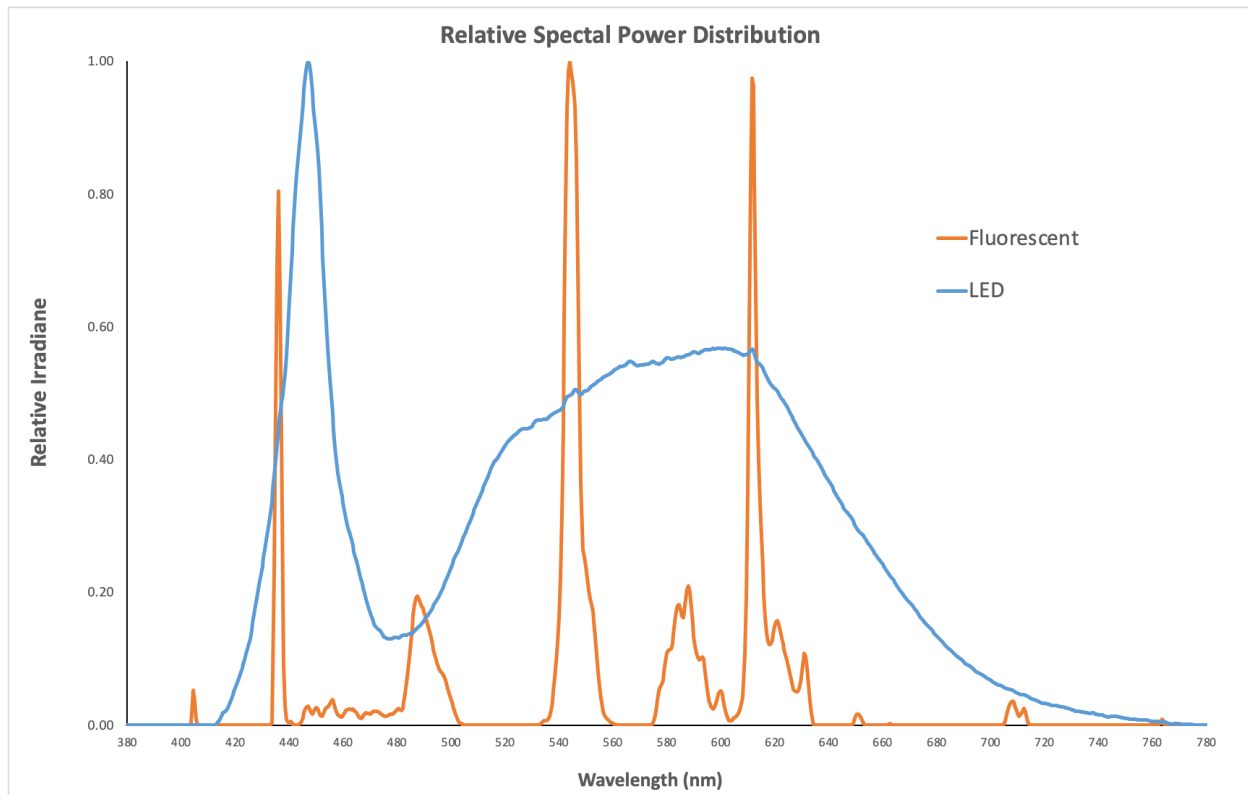

206

207 **Figure 4. Normalized spectral power distribution for the fluorescent control light**  
208 **(non-disinfecting) and standard LED light (without 405nm) used in the study.**

209 **Each spectrum is normalized relative to its own peak value.**

210

## 211 **Cells and viruses**

212 Vero-E6 cells (ATCC® CRL-1586™, clone E6) were maintained in Dulbecco's Modified  
213 Eagle Medium (DMEM) complemented with 10% heat-inactivated Fetal Bovine Serum  
214 (HI-FBS; PEAK serum), penicillin-streptomycin (Gibco; 15140-122), HEPES buffer  
215 (Gibco; 15630-080) and MEM non-essential amino-acids (Gibco; 25025CL) at 37°C with  
216 5% CO<sub>2</sub>. Vero-CCL81 (ATCC® CRL-81™) cells and MDCK cells (ATCC® CCL-34)  
217 were cultured in DMEM supplemented with 10% HI-FBS and penicillin/streptomycin at -  
218 37°C with 5% CO<sub>2</sub>. All experiments involving SARS-CoV2 (USA-WA1/202, BEI

219 resource – NR52281) were conducted within a biosafety-level 3 (BSL3) containment  
220 facility at Icahn school of medicine at Mount Sinai by trained workers upon authorization  
221 of protocols by a biosafety committee. Amplification of SARS-CoV-2 viral stocks was  
222 done in Vero-E6 cell confluent monolayers by using an infection medium composed of  
223 DMEM supplemented with 2% HI-FBS, Non-essential amino acids (NEAA), HEPES and  
224 penicillin-streptomycin at 37°C with 5% CO<sub>2</sub> for 72 hours. Influenza A virus used here  
225 was generated using plasmid based reverse genetics system as previously described<sup>34</sup>.  
226 The backbone used in the study was A/Puerto Rico/8/34/Mount Sinai(H1N1) under the  
227 GenBank accession number AF389122. IAV-PR8 virus was grown and titrated in MDCK  
228 as previously described<sup>34</sup>. As a non-enveloped virus, the cell culture adapted murine  
229 Encephalomyocarditis virus (EMCV; ATCC® VR-12B) was propagated and titrated in  
230 Vero-CCL81 cells with DMEM and 2% HI-FBS and penicillin-streptomycin at 37°C with  
231 5% CO<sub>2</sub> for 48 hours<sup>35</sup>.

#### 232 **405nm inactivation of viruses**

233 The SARS-CoV-2 virus was exclusively handled at the Icahn school of Medicine BSL-3  
234 and studies involving IAV and EMCV were handled in BSL-2 conditions. Indicated PFU  
235 amounts were mixed with sterile 1X PBS and were irradiated in 96 well format cell  
236 culture plates in triplicates. In these studies, A starting dose of 5x10<sup>5</sup> PFU for SARS-  
237 CoV-2 and starting doses of 1x10<sup>5</sup> PFU for IAV and EMCV were used. The final  
238 volumes for inactivation were 250 µl per replicate. The untreated samples were  
239 prepared the same way and were left inside the biosafety cabinet isolated from the  
240 inactivation device at room temperature. The plates were sealed with qPCR plate  
241 transparent seal and an approximate 10% reduction of the intensity was observed due

242 to the sealing film. The distance from the lamp and the samples was measured to be  
243 10". All samples were extracted at indicated times and were frozen at -80°C and were  
244 thawed together for titration via plaque assays.

#### 245 **Plaque assays**

246 For SARS-CoV-2 studies, confluent monolayers of Vero-E6 cells in 12-well plate format  
247 were infected (with an inoculum volume 150µl) with 10-fold serially diluted samples in  
248 1X phosphate-buffered saline (PBS) supplemented with bovine serum albumin (BSA)  
249 and penicillin-streptomycin for an hour while gently shaking the plates every 15 minutes.  
250 Afterwards, the inoculum was removed, and the cells were incubated with an overlay  
251 composed of MEM with 2% FBS and 0.05% Oxoid agar for 72 hours at 37°C with 5%  
252 CO<sub>2</sub>. The plates were subsequently fixed using 10% formaldehyde overnight and the  
253 formaldehyde was removed along with the overlay. Fixed monolayers were blocked with  
254 5% milk in Tris-buffered saline with 0.1% tween-20 (TBS-T) for an hour. Afterwards,  
255 plates were immunostained using a monoclonal antibody against SARS-CoV2  
256 nucleoprotein (Creative-Biolabs; NP1C7C7) at a dilution of 1:1000 followed by 1:5000  
257 anti-mouse IgG monoclonal antibody and was developed using KPL TrueBlue  
258 peroxidase substrate for 10 minutes (Seracare; 5510-0030). After washing the plates  
259 with distilled water, the number of a plaques were counted. Plaque assays for IAV and  
260 EMCV were done in a similar fashion. For IAV, confluent monolayers of MDCK cells  
261 supplemented with MEM-based overlay with TPCK-treated trypsin was used and was  
262 incubated for 48 hours at 37°C with 5% CO<sub>2</sub>. For EMCV, Vero-CCL81 cells were used  
263 to do plaque assays in 6 well plate format with an inoculum volume of 200µl and was  
264 incubated for 48 hours at 37°C with 5% CO<sub>2</sub>. Plaques for IAV and EMCV were

265 visualized using crystal violet. Data shown here is derived from three independent  
266 experimental setups.

## 267 **Results.**

### 268 **Dose and time dependent inactivation of SARS-CoV-2 in the absence of** 269 **photosensitizers.**

270 The lowest irradiation dose of  $0.035 \text{ mWcm}^{-2}$  was applied for SARS-CoV-2 and when  
271 compared to the  $T_{4H}$  untreated control, a reduction of  $0.3288 \log_{10}$  was seen as early as  
272 4 hours and after 24 hours of irradiation, an inactivation of  $1.0325 \log_{10}$  (approximately  
273 10 times reduction in infectivity) was observed for SARS-CoV-2 via plaque assays  
274 (Figure 5A). A slightly higher dose of  $0.076 \text{ mWcm}^{-2}$  yielded  $0.4123 \log_{10}$ ,  $0.6118 \log_{10}$   
275 and  $1.5393 \log_{10}$  reduction by 4, 8 and 12 hours post irradiation when compared to the  
276 respective untreated controls (Figure 5B). Subsequent increase of the irradiation dose  
277 to  $0.150 \text{ mWcm}^{-2}$  resulted in a reduction of  $0.4771 \log_{10}$  after 4 hours which then had a  
278  $1.1206 \log_{10}$  after 12 hours. Irradiation for 24 hours at  $0.150 \text{ mWcm}^{-2}$  suggested a total  
279 reduction of  $2.0056 \log_{10}$  (256 times) for SARS-CoV-2 and (Figure 5C). As a final  
280 experiment, a high irradiation dose of  $0.6 \text{ mWcm}^{-2}$  was used to assess the inactivation  
281 potential within a much shorter time frame. Irradiation for one hour resulted in a  
282 reduction of  $0.4150 \log_{10}$  which reached  $1.2943 \log_{10}$  reduction by four hours and  $2.309$   
283  $\log_{10}$  (385 times) after 8 hours in comparison to untreated controls samples at the  
284 corresponding times. (Figure 5 D and E). All experimental conditions demonstrated the  
285 stability of untreated SARS-CoV-2 which was left at room temperature in PBS, as  
286 shown by the marginal reduction of viral titer over time.

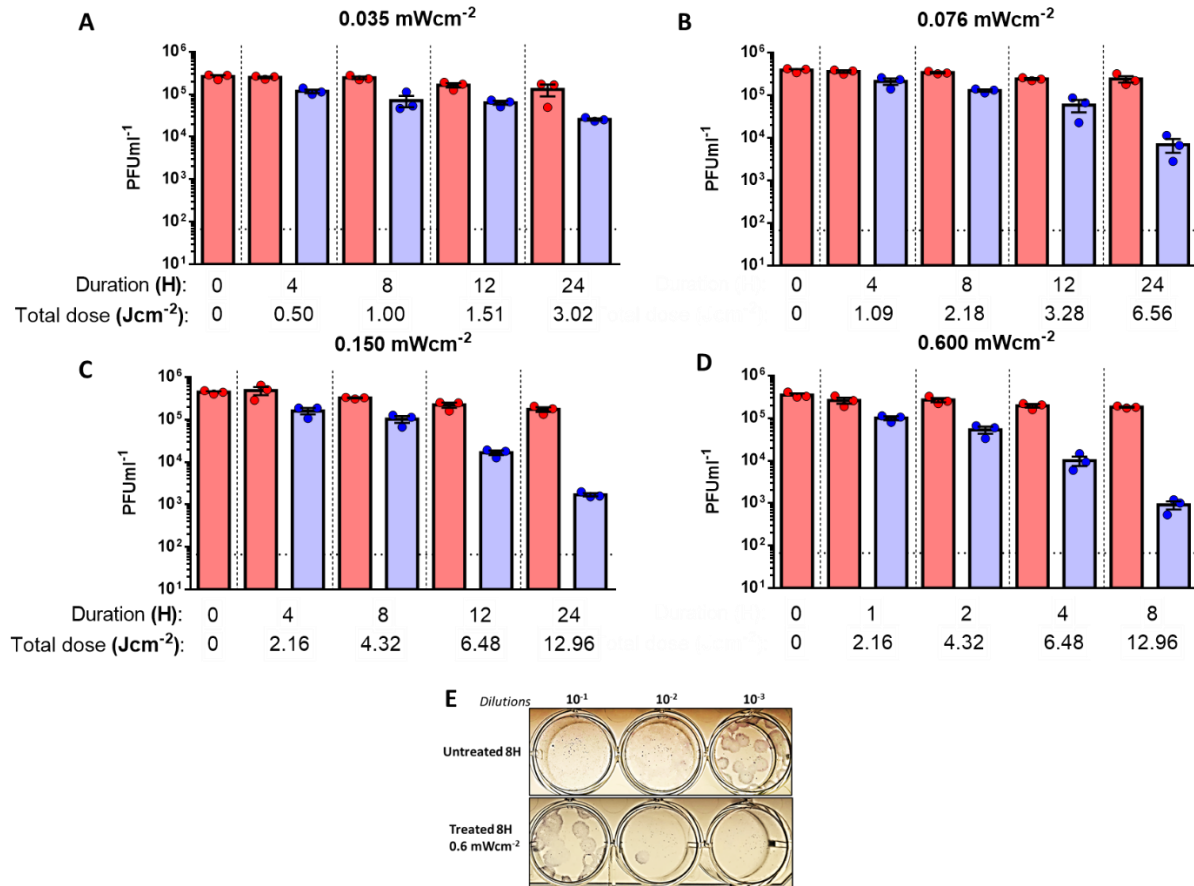

287

288 **Figure 5. Dose and time dependent inactivation of SARS-CoV-2 virus in PBS by 405 nm irradiation.** A. A dose of 0.035  
 289 mWcm<sup>-2</sup> or B. a dose of 0.076 mWcm<sup>-2</sup> or C. a dose of 0.150 mWcm<sup>-2</sup> or D. a dose of 0.6 mWcm<sup>-2</sup> was applied to irradiate samples  
 290 at 405 nm over a course of 24 while sampling at 4, 8, 12 and 24 hours (for A, B and C) or over a course of 8 hours while sampling at  
 291 1, 2, 4 and 8 hours (D) was done in independent triplicates. Blue bars indicate treated samples and red bars correspond to the  
 292 untreated equivalent that was left at the biosafety cabinet under the same conditions while not subjecting to disinfecting irradiation.  
 293 Data shown as PFU ml<sup>-1</sup> in triplicate assessed by plaque assay. E. Plaque phenotype comparison from one independent experiment  
 294 at an irradiation dose of 0.6 mWcm<sup>-2</sup>. Fixed and blocked plaques were immunostained using anti-SARS-CoV-2/NP antibody before  
 295 developing using TrueBlue reagent. Data show in here are from three independent replicates (Mean+SEM).

296 **Influenza A virus is susceptible to 405 nm inactivation in the absence of**  
 297 **photosensitizers.**

298 Given the observations derived from SARS-CoV-2, a separate inactivation study using a  
 299 different lipid-enveloped RNA virus was conducted by using influenza A Puerto Rico  
 300 (A/H1N1/PR8-Mount Sinai) virus strain. Irradiation with a high dose of 0.6 mWcm<sup>-2</sup>



301 suggested a time dependent reduction of infectious titers as calculated by the 0.1619  
302  $\log_{10}$ , 0.5609  $\log_{10}$ , and 1.6115  $\log_{10}$  (66 times) reductions at 1, 2, 4 and 8 hours  
303 respectively (Figure 6A). And the reduction of plaques was apparent (figure 6B).

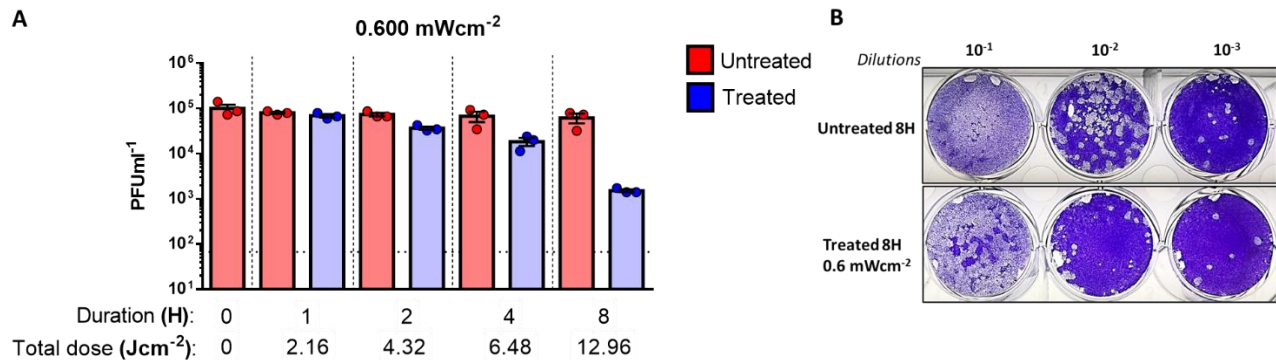

304  
305 **Figure 6 Inactivation of Influenza A virus in PBS by 405 nm irradiation.** A. A dose of 0.6 mWcm<sup>-2</sup> was applied to irradiate  
306 samples at 405 nm over a course 8 hours while sampling at 1, 2, 4 and 8 hours (done in independent triplicates). Blue bars indicate  
307 treated samples and red bars correspond to the untreated equivalent that was left at the biosafety cabinet under the same  
308 conditions while not subjected to disinfecting irradiation. Data shown as PFUml<sup>-1</sup> in triplicate assessed by plaque assay. B. Plaque  
309 phenotype comparison from one independent experiment at an irradiation dose of 0.6 mWcm<sup>-2</sup>. Fixed and blocked plaques were  
310 stained using crystal violet. Data show in here are from three independent replicates (Mean+SEM).

311 The stability of IAV virus at room temperature for a period of 8 hours was found to be  
312 the negligible in untreated IAV spiked PBS samples (Figure 6A).

313 **Encephalomyocarditis virus (EMCV) as a model non-enveloped virus indicates**  
314 **reduced susceptibility to 405 nm inactivation in the absence of photosensitizers.**

315 In order to better understand the effect of the lipid-envelope in viral inactivation by 405  
316 nm irradiation, we used a non-lipid enveloped RNA virus derived from the  
317 *Picornaviridae* family. EMCV virus was irradiated at a high dose of 0.6 mWcm<sup>-2</sup> similar  
318 to SARS-CoV-2 and IAV.

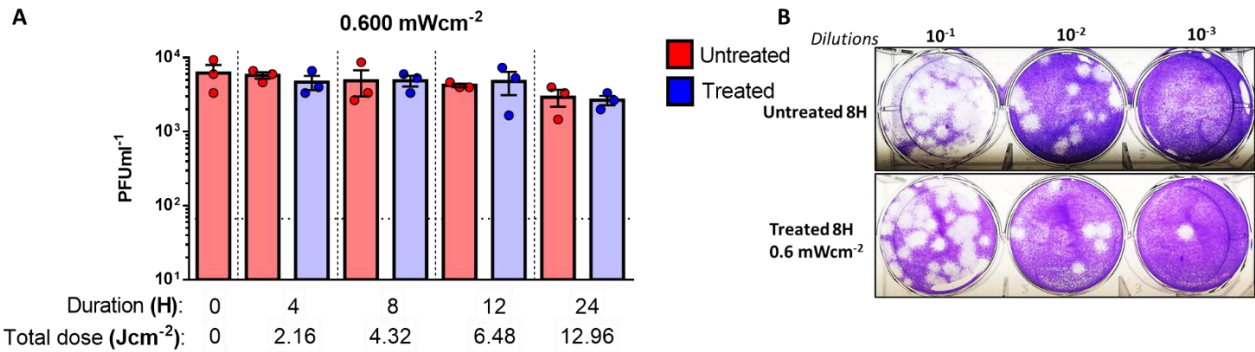

319

320 **Figure 7. Encephalomyocarditis virus (EMCV) in PBS shows reduced susceptibility to 405 nm irradiation. A.** A dose of 0.6  
321 mWcm<sup>-2</sup> was applied to irradiate samples at 405 nm over a course 8 hours while sampling at 1, 2, 4 and 8 hours (done in  
322 independent triplicates). Blue bars indicate treated samples and red bars correspond to the untreated equivalent that was left at the  
323 biosafety cabinet under the same conditions while not subjected to disinfecting irradiation. Data shown as PFUml<sup>-1</sup> in triplicate  
324 assessed by plaque assay. **B.** Plaque phenotype comparison from one independent experiment at an irradiation dose of 0.6 mWcm<sup>-2</sup>.  
325 Fixed and blocked plaques were stained using crystal violet. Data show in here are from three independent replicates  
326 (Mean+SEM).

327 In this case however, a total reduction of 0.0969 (approximately 2 times) in comparison  
328 to the untreated after 8 hours of irradiation was observed (Fig 7A and 7B) indicating a  
329 lower rate of inactivation (despite identical dosing) in contrast to the lipid-enveloped  
330 RNA viruses tested in this study. The plaque reduction at 8 hours did not indicate the  
331 same dramatic reduction as observed with the latter studies.

332 As shown in Figure 4, standard LED lighting (without the specific addition of 405nm  
333 light) has a small but measurable amount of disinfecting light (0.006 mWcm<sup>-2</sup>) in the  
334 400nm to 420nm range. To quantify the disinfecting effect of this light, irradiations were  
335 performed for 4h, 8h, 12h, and 24 h. A reduction was observed. {Raveen to add  
336 detail}. These results at 24h were largely consistent with other irradiation levels and  
337 reinforce the general observation of a 405nm dose-dependent effect. The intermediate  
338 irradiation levels (4h, 8h, and 12h) were generally larger than expected even when  
339 accounting for experimental uncertainty.

340

## 341 **Discussion**

342 The ongoing SARS-CoV-2 pandemic has affected the day-to-day functions in the entire  
343 world, raising concerns not only with regards to therapeutics but also in the context of  
344 virus survivorship and decontamination<sup>36</sup>. Taking into consideration the rapid spread of  
345 SARS-CoV-2 from person to person by droplets, aerosols, and fomites, whole-room  
346 disinfection systems can be viewed as a supplement to best practices for interrupting  
347 transmission of the virus.

348 Given the ongoing COVID-19 pandemic, we wanted to explore the impact of 405 nm  
349 enriched visible light technology on inactivation of respiratory pathogens such as SARS-  
350 CoV-2 and influenza A virus.

351 Without the use of exogenous photosensitizers, we were able to show that irradiation  
352 with low intensity ( $0.035 \text{ mWcm}^{-2}$ ) visible light yielded a reduction of  $\log_{10} 0.3288$   
353 inactivation after four hours ( $0.5 \text{ Jcm}^{-2}$ ) and a total  $\log_{10} 1.0325$  inactivation of SARS-  
354 CoV-2 after 24 hours ( $3.02 \text{ Jcm}^{-2}$ ). A slightly higher dose ( $0.076 \text{ mWcm}^{-2}$ ) resulted in  
355  $\log_{10} 1.5393$  reduction after 24 hours ( $6.56 \text{ Jcm}^{-2}$ ) while an irradiation dose of  $0.150$   
356  $\text{mWcm}^{-2}$  showed a reduction  $\log_{10} 2.0056$  after 24 hours ( $12.96 \text{ Jcm}^{-2}$ ) of irradiation.  
357 Finally, increasing the dose to  $0.6 \text{ mWcm}^{-2}$  yielded  $\log_{10} 2.3010$  reduction only after  
358 eight hours ( $12.96 \text{ Jcm}^{-2}$ ), indicating a both time and dose dependent inactivation of  
359 infectious viruses.

360 **The irradiations using standard LED lighting raise some interesting questions for further**  
361 **discussion. With nearly 6x the amount of disinfecting light as compared to traditional**  
362 **fluorescent lighting but 1/6<sup>th</sup> the lowest amount of 405nm used in the study; it is**  
363 **conceivable that a reduction could be observed. The magnitude of this effect at less**

364 than 24h was larger than expected based on other irradiations performed in this study.  
365 A similar effect was observed by Bache, et. al {REF} in whole-room bacterial reduction  
366 studies. They saw a disinfecting effect for irradiance values as low as 0.023 mWcm<sup>-2</sup>.  
367 This effect was shown to be uncorrelated to the level of irradiance used suggesting that  
368 the mere abundance of 405nm light can initiate the oxidizing chemical reaction.  
369 Nevertheless, our results clearly show a dose-dependent effect. One possible  
370 explanation for this observation is that the lower irradiance levels expose different  
371 responses by specific organisms within a population based on the individual biology of  
372 that organism. Clearly, these results suggest that additional factors may be at work and  
373 warrant further investigation.

374 We selected conventional plaque assays as the read out to specifically estimate  
375 infectious virus titers upon disinfection. Methods based in the quantification of viral RNA  
376 via PCR based techniques might be misleading as they detect viral RNA from both  
377 infectious and noninfectious virions.

378 SARS-CoV-2 is a lipid-enveloped virus composed of a ssRNA genome and our data  
379 indicates its susceptibility to visible light mediated inactivation. To further confirm these  
380 observations, we used influenza A virus. which is another human respiratory virus with a  
381 lipid envelop and an segmented-RNA genome. Upon irradiating for 1 hour at 0.6  
382 mWcm<sup>-2</sup> (2.16 Jcm<sup>-2</sup>), we observed a total reduction of log<sub>10</sub> 0.1619 for the influenza A  
383 virus compared to the reduction of log<sub>10</sub> 0.4150 for SARS-CoV-2 under the same  
384 conditions. While both viruses have lipid envelopes, there is clearly a difference here  
385 that will require further study. One possible explanation is the difference in the virion  
386 size creating a physically smaller cross-section for absorption. (IAV ~120 nm and

387 SARS-CoV-2 ~200 nm)<sup>37, 38</sup>. Nevertheless, both viruses were largely inactivated after  
388 eight hours achieving more 1.5 log<sub>10</sub> reduction. Intriguingly, it was observed that both  
389 RNA viruses were able to remain stable at room temperature for at least 24 hours,  
390 indicating minimal decay which is consistent with previous studies<sup>36, 39</sup>. We next  
391 irradiated a non-enveloped RNA virus, EMCV. Previous results for visible light against  
392 non-enveloped viruses demonstrated the need for external photosensitizers such as  
393 artificial saliva, blood, feces, etc<sup>30, 36</sup>. Without a porphyrin containing medium, we  
394 expected little to no inactivation when this virus was irradiated with visible light. For  
395 these measurements, we used the highest available irradiance of 0.6 mWcm<sup>-2</sup>. As  
396 anticipated, we observed only a log<sub>10</sub> 0.0969 reduction after eight hours, however, this  
397 appears to be with the statistical precision of the measurement based on the results  
398 obtained from shorter irradiations (1, 2, and 4 hours). For comparison, a study involving  
399 the M13-bacteriophage virus (a non-enveloped virus) showed a 3-Log reduction using  
400 an irradiance of 50mWcm<sup>-2</sup> (almost 100 times greater than the highest irradiance used  
401 in this study) for 10 hours at 425 nm further supporting the idea that non-enveloped  
402 viruses may require higher doses of visible light<sup>40</sup>.

403 Our study was conducted using a neutral liquid media composed of PBS without any  
404 photosensitizers and we were able to show that visible light can indeed inactivate lipid-  
405 enveloped viruses, differing from the theory that states that photosensitizers are a  
406 requirement for inactivation. While these results provide insight into the basic science  
407 involved, they were performed within the context of the applied science needed to show  
408 the potential impact of this technology upon the current COVID-19 pandemic. By using

409 safe, commercially practical irradiance levels, our results are more directly translatable  
410 to occupied rooms in the clinical environment.

411 Other studies which used visible light-based irradiation have shown similar results in the  
412 absence of photosensitizers, indicating the possibility of an alternative inactivation  
413 mechanism<sup>23, 25, 30</sup>. Studies have proposed two theories for this observation primarily  
414 due to non-405nm wavelengths emitted by the source: 1) some amount of 420-430 nm  
415 emitted from the source is contributing to the viral inactivation <sup>41</sup>, and 2) the presence of  
416 UV-A (390 nm) within the source. This wavelength is known to create oxidative stress  
417 upon viral capsids<sup>42</sup>.

418 Longer wavelengths, such as 420-430nm, have shown inactivation of the murine  
419 leukemia virus (MRV-A) <sup>41</sup>. While this is an intriguing study, it used a broad-spectrum  
420 lamp with optical filters to selectively identify the spectrum primarily responsible with  
421 their results. Unfortunately, they did not quantify the amount of light (using radiometric  
422 units) within the spectrum of interest used to irradiate the virus. While transmission  
423 profile of the filters used were provided, it does not consider the spectral composition of  
424 the source itself making any direct quantitative comparison between our studies  
425 impossible. It is interesting to note that they did observe viral inactivation in their  
426 controls from wavelengths less than 420nm confirming the qualitative findings of our  
427 study without confirming the specific use of 405nm. This suggests that the viral  
428 inactivation is a likely a broad response (> 20nm) with relative contributions unique to  
429 the chemistry of each organism. They also considered much longer exposures (~7  
430 days) and much higher illuminance (> 200 lux) than that used in our study although this  
431 is again difficult to compare given the lack of radiometric quantification of their light

432 source. It is important to note that the control samples used in our study were exposed  
433 to the same overhead (non-405nm) lights as the irradiated samples and our results are  
434 the observed difference between the two demonstrating the contribution from 405nm  
435 over and above that potentially from 420-430nm. Future experiments can further  
436 quantify the potential effect.

437 The other theory, potential UV-A irradiation, was historically applied to lamp-based  
438 sources with broad spectral (> 100nm) outputs. Again, the use of LED technology  
439 addresses this question as the peak irradiance at 390nm of the device used in this  
440 study was < 1% of its peak irradiance at 405nm without the need for any additional  
441 filtration. Future experiments can further quantify the potential effect.

442 Another consideration to be addressed is thermal heating of the virus by the LED  
443 source. Tsen and Achilefu used a pulsed laser method at 425nm<sup>43</sup> with ~100 mWcm<sup>-2</sup>  
444 average power density for < 2h while simultaneously measuring the sample temperature  
445 with a thermocouple. They detected less than a 2°C demonstrating minimal temperature  
446 impact even under a power density nearly 9 orders of magnitude larger than that used  
447 in this study. This was confirmed by our thermocouple measurements as stated earlier.  
448 Nazari, *et al* used an 805nm source with an average power density of > 0.3 Wcm<sup>-2</sup> for  
449 10s, nearly 1000 times that used in this study<sup>44</sup>. While the total energy delivered was  
450 more comparable to that used in our study, they did not make explicit temperature  
451 measurements, their analysis ruled out any potential thermal effects.

452 One possible explanation for the observed differences between the enveloped and non-  
453 enveloped organisms is absorption of the 405nm light by the lipid envelope itself. This  
454 could, in turn, lead to the creation of reactive oxygen species (causing an oxidative

455 effect) or simply destruction of the envelope leading to a denaturing of the organism.

456 This question could serve as the basis for a range of future studies.

457 The results obtained suggest that the performance of visible light against SARS-CoV-2

458 is similar to other organisms commonly found in the environment such as *S. aureus*.

459 Previous studies have shown that the visible light irradiance levels used in this study

460 ( $0.035 \text{ mWcm}^{-2}$  to  $0.6 \text{ mWcm}^{-2}$ ) reduce bacteria levels in occupied rooms and improve

461 outcomes for surgical procedures. It is therefore reasonable to conclude that visible light

462 might be an effective disinfectant against SARS-CoV-2. More importantly, this

463 disinfection can operate continuously as it is safe for humans based upon the exposure

464 guidelines in IEC 62471<sup>45</sup>. This means that once it has been in use for a period of time,

465 the environment will be cleaner and safer the next time it is occupied by humans.

466 One limitation of this study is that the inactivation assays were performed in static liquid

467 media as opposed to aerosolized droplets. While the use of visible light in air

468 disinfection has been briefly studied where it was shown that its effectiveness increased

469 approximately 4-fold<sup>46</sup>, further studies involving dynamic aerosolization are needed to

470 better understand the true potential of visible light mediated viral inactivation.

471 In any case, our study shows the increased susceptibility of enveloped respiratory viral

472 pathogens to 405 nm mediated inactivation in the absence of photosensitizers. The

473 irradiances used in this study are very low and might be easily applied to disinfect

474 occupied areas safely and continuously within hospitals, schools, restaurants, offices

475 and other locations. Of particular interest is the potential for standard LED lighting to

476 play a role in reducing the presence of SARS-CoV-2 in the environment.

477 **Conclusions**



478 We have demonstrated the basic science of inactivation of enveloped viruses such as  
479 SARS-CoV-2 and Influenza-A using 405nm visible light within the context of the applied  
480 science required for this technology to have an impact upon the current COVID-19  
481 pandemic. Without the need for exogenous photosensitizers and by using safe,  
482 commercially practical irradiance levels, our results can be easily translated to the  
483 clinical environment.

#### 484 **Future Efforts**

485 Future work should focus on explaining the difference between the enveloped and non-  
486 enveloped results. This may include transmission electron microscopy (TEM),  
487 hemagglutination assay (HA), or other methods focusing on the potential role that a  
488 mediated reaction (due to the envelope itself) might play. The size of the virion particle  
489 may play a role in photoelectric absorption and could be studied for different viral  
490 species. We acknowledge that while unlikely, other wavelengths of visible light, beyond  
491 400-420nm may play a role in the inactivation process and future studies should explore  
492 this possibility as well. Finally, the inactivation kinetics of low irradiances could add  
493 valuable insight into clinical applications of this technology.

#### 494 **Acknowledgments**

495 We thank Kenall Manufacturing for supplying the M4DLIC6 fixture and test rig used in  
496 this study. We thank Randy Albrecht for support with the BSL3 facility and procedures  
497 at the ISMMS, and Richard Cadagan for technical assistance. This research was partly  
498 funded by CRIP (Center for Research for Influenza Pathogenesis), a NIAID supported  
499 Center of Excellence for Influenza Research and Surveillance (CEIRS, contract #  
500 HHSN272201400008C); by the generous support of the JPB Foundation, the Open

501 Philanthropy Project (research grant 2020-215611 (5384)) and anonymous donors to  
502 AG-S, and by a research contract from Kenall Manufacturing to the AG-S lab.

### 503 **Conflicts of interest**

504 The García-Sastre Laboratory has received research support from Pfizer, Senhwa  
505 Biosciences, 7Hills Pharma, Avimex, Blade Therapeutics, Dynavax, ImmunityBio,  
506 Nanocomposix and Kenall Manufacturing. Adolfo García-Sastre has consulting  
507 agreements for the following companies involving cash and/or stock: Vivaldi  
508 Biosciences, Pagoda, Contrafect, 7Hills Pharma, Avimex, Vaxalto, Accurius, Pfizer and  
509 Esperovax. RR, CY and AGS have filed for a provisional patent based upon these  
510 results.

### 511 **References**

- 512 1. Andersen, K. G., Rambaut, A., Lipkin, W. I., Holmes, E. C. & Garry, R. F. The  
513 proximal origin of SARS-CoV-2. *Nat. Med.* **26**, 450-452 (2020).
- 514 2. Worldometer, D. COVID-19 coronavirus pandemic. *World Health Organization*,  
515 [www.worldometers.info](http://www.worldometers.info) (2020).
- 516 3. Buitrago-Garcia, D. *et al.* Occurrence and transmission potential of asymptomatic and  
517 presymptomatic SARS-CoV-2 infections: A living systematic review and meta-analysis.  
518 *PLoS medicine* **17**, e1003346 (2020).
- 519 4. [https://www.who.int/news-room/commentaries/detail/modes-of-transmission-of-virus-  
520 causing-covid-19-implications-for-ipc-precaution-recommendations](https://www.who.int/news-room/commentaries/detail/modes-of-transmission-of-virus-causing-covid-19-implications-for-ipc-precaution-recommendations).
- 521 5. Dehbandi, R. & Zazouli, M. A. Stability of SARS-CoV-2 in different environmental  
522 conditions. *The Lancet Microbe* **1**, e145 (2020).
- 523 6. Van Doremalen, N. *et al.* Aerosol and surface stability of SARS-CoV-2 as compared  
524 with SARS-CoV-1. *N. Engl. J. Med.* **382**, 1564-1567 (2020).
- 525 7. Behzadinasab, S., Chin, A., Hosseini, M., Poon, L. & Ducker, W. A. A surface coating  
526 that rapidly inactivates SARS-CoV-2. *ACS applied materials & interfaces* **12**, 34723-  
527 34727 (2020).

- 528 8. Chan, K. *et al.* Factors affecting stability and infectivity of SARS-CoV-2. *J. Hosp.*  
529 *Infect.* **106**, 226-231 (2020).
- 530 9. Biryukov, J. *et al.* Increasing Temperature and Relative Humidity Accelerates  
531 Inactivation of SARS-CoV-2 on Surfaces. *mSphere* **5**, 10.1128/mSphere.00441-20  
532 (2020).
- 533 10. Aboubakr, H. A., Sharafeldin, T. A. & Goyal, S. M. Stability of SARS-CoV-2 and  
534 other coronaviruses in the environment and on common touch surfaces and the  
535 influence of climatic conditions: A review. *Transboundary and emerging diseases*  
536 (2020).
- 537 11. Smither, S. J., Eastaugh, L. S., Findlay, J. S. & Lever, M. S. Experimental aerosol  
538 survival of SARS-CoV-2 in artificial saliva and tissue culture media at medium and high  
539 humidity. *Emerging microbes & infections* **9**, 1415-1417 (2020).
- 540 12. Schuit, M. *et al.* Airborne SARS-CoV-2 is rapidly inactivated by simulated sunlight.  
541 *J. Infect. Dis.* **222**, 564-571 (2020).
- 542 13. Kampf, G., Todt, D., Pfaender, S. & Steinmann, E. Persistence of coronaviruses on  
543 inanimate surfaces and their inactivation with biocidal agents. *J. Hosp. Infect.* **104**, 246-  
544 251 (2020).
- 545 14. Rutala, W. A. & Weber, D. J. Disinfection and sterilization in health care facilities:  
546 what clinicians need to know. *Clinical infectious diseases* **39**, 702-709 (2004).
- 547 15. Rathnasinghe, R. *et al.* Scalable, effective, and rapid decontamination of SARS-  
548 CoV-2 contaminated N95 respirators using germicidal ultra-violet C (UVC) irradiation  
549 device. *medRxiv* (2020).
- 550 16. Escombe, A. R. *et al.* Upper-room ultraviolet light and negative air ionization to  
551 prevent tuberculosis transmission. *PLoS Med* **6**, e1000043 (2009).
- 552 17. Nakpan, W., Yermakov, M., Indugula, R., Reponen, T. & Grinshpun, S. A.  
553 Inactivation of bacterial and fungal spores by UV irradiation and gaseous iodine  
554 treatment applied to air handling filters. *Sci. Total Environ.* **671**, 59-65 (2019).
- 555 18. Tseng, C. & Li, C. Inactivation of viruses on surfaces by ultraviolet germicidal  
556 irradiation. *Journal of occupational and environmental hygiene* **4**, 400-405 (2007).
- 557 19. Kowalski, W. in *Ultraviolet germicidal irradiation handbook: UVGI for air and surface*  
558 *disinfection* (Springer science & business media, 2010).
- 559 20. Zaffina, S. *et al.* Accidental exposure to UV radiation produced by germicidal lamp:  
560 case report and risk assessment. *Photochem. Photobiol.* **88**, 1001-1004 (2012).

- 561 21. Leung, K. C. P. & Ko, T. C. S. Improper Use of the Germicidal Range Ultraviolet  
562 Lamp for Household Disinfection Leading to Phototoxicity in COVID-19 Suspects.  
563 *Cornea* **40**, 121-122 (2021).
- 564 22. Maclean, M. *et al.* Environmental decontamination of a hospital isolation room using  
565 high-intensity narrow-spectrum light. *J. Hosp. Infect.* **76**, 247-251 (2010).
- 566 23. Maclean, M., McKenzie, K., Anderson, J. G., Gettinby, G. & MacGregor, S. J. 405  
567 nm light technology for the inactivation of pathogens and its potential role for  
568 environmental disinfection and infection control. *J. Hosp. Infect.* **88**, 1-11 (2014).
- 569 24. Murrell, L. J., Hamilton, E. K., Johnson, H. B. & Spencer, M. Influence of a visible-  
570 light continuous environmental disinfection system on microbial contamination and  
571 surgical site infections in an orthopedic operating room. *Am. J. Infect. Control* **47**, 804-  
572 810 (2019).
- 573 25. Maclean, M., Murdoch, L. E., MacGregor, S. J. & Anderson, J. G. Sporicidal effects  
574 of high-intensity 405 nm visible light on endospore-forming bacteria. *Photochem.*  
575 *Photobiol.* **89**, 120-126 (2013).
- 576 26. Murdoch, L., McKenzie, K., Maclean, M., Macgregor, S. & Anderson, J. Lethal  
577 effects of high-intensity violet 405-nm light on *Saccharomyces cerevisiae*, *Candida*  
578 *albicans*, and on dormant and germinating spores of *Aspergillus niger*. *Fungal Biology*  
579 **117**, 519-527 (2013).
- 580 27. Dai, T. *et al.* Blue light for infectious diseases: *Propionibacterium acnes*,  
581 *Helicobacter pylori*, and beyond? *Drug Resistance Updates* **15**, 223-236 (2012).
- 582 28. Bumah, V. V. *et al.* Spectrally resolved infrared microscopy and chemometric tools  
583 to reveal the interaction between blue light (470 nm) and methicillin-resistant  
584 *Staphylococcus aureus*. *Journal of Photochemistry and Photobiology B: Biology* **167**,  
585 150-157 (2017).
- 586 29. Hadi, J., Dunowska, M., Wu, S. & Brightwell, G. Control Measures for SARS-CoV-2:  
587 A Review on Light-Based Inactivation of Single-Stranded RNA Viruses. *Pathogens* **9**,  
588 737 (2020).
- 589 30. Tomb, R. M. *et al.* New proof-of-concept in viral inactivation: virucidal efficacy of 405  
590 nm light against feline calicivirus as a model for norovirus decontamination. *Food and*  
591 *environmental virology* **9**, 159-167 (2017).
- 592 31. Ho, D. T. *et al.* Effect of blue light emitting diode on viral hemorrhagic septicemia in  
593 olive flounder (*Paralichthys olivaceus*). *Aquaculture* **521**, 735019 (2020).

- 594 32. Wu, J. *et al.* Virucidal efficacy of treatment with photodynamically activated  
595 curcumin on murine norovirus bio-accumulated in oysters. *Photodiagnosis and*  
596 *photodynamic therapy* **12**, 385-392 (2015).
- 597 33. Maclean, M., MacGregor, S. J., Anderson, J. G. & Woolsey, G. High-intensity  
598 narrow-spectrum light inactivation and wavelength sensitivity of *Staphylococcus aureus*.  
599 *FEMS Microbiol. Lett.* **285**, 227-232 (2008).
- 600 34. Martinez-Sobrido, L. & Garcia-Sastre, A. Generation of recombinant influenza virus  
601 from plasmid DNA. *J. Vis. Exp.* **(42)**. pii: **2057**. doi, 10.3791/2057 (2010).
- 602 35. Carocci, M. & Bakkali-Kassimi, L. The encephalomyocarditis virus. *Virulence* **3**, 351-  
603 367 (2012).
- 604 36. Derraik, J. G., Anderson, W. A., Connelly, E. A. & Anderson, Y. C. Rapid evidence  
605 summary on SARS-CoV-2 survivorship and disinfection, and a reusable PPE protocol  
606 using a double-hit process. *MedRxiv* (2020).
- 607 37. Bouvier, N. M. & Palese, P. The biology of influenza viruses. *Vaccine* **26**, D49-D53  
608 (2008).
- 609 38. Bar-On, Y. M., Flamholz, A., Phillips, R. & Milo, R. Science Forum: SARS-CoV-2  
610 (COVID-19) by the numbers. *Elife* **9**, e57309 (2020).
- 611 39. Wang, X., Zoueva, O., Zhao, J., Ye, Z. & Hewlett, I. Stability and infectivity of novel  
612 pandemic influenza A (H1N1) virus in blood-derived matrices under different storage  
613 conditions. *BMC infectious diseases* **11**, 1-6 (2011).
- 614 40. Tomb, R. M. *et al.* Inactivation of *Streptomyces* phage  $\phi$ C31 by 405 nm light:  
615 Requirement for exogenous photosensitizers? *Bacteriophage* **4**, e32129 (2014).
- 616 41. Richardson, T. B. & Porter, C. D. Inactivation of murine leukaemia virus by exposure  
617 to visible light. *Virology* **341**, 321-329 (2005).
- 618 42. Girard, P. *et al.* *UVA-induced damage to DNA and proteins: direct versus indirect*  
619 *photochemical processes* (Journal of Physics: Conference Series Ser. 261, IOP  
620 Publishing, 2011).
- 621 43. Tsen, S. D. *et al.* Studies of inactivation mechanism of non-enveloped icosahedral  
622 virus by a visible ultrashort pulsed laser. *Virology journal* **11**, 1-9 (2014).
- 623 44. Nazari, M. *et al.* Plasmonic enhancement of selective photonic virus inactivation.  
624 *Scientific reports* **7**, 1-10 (2017).
- 625 45. IEC 62471: Photobiological safety of lamps and lamp systems. (2006).

626 46. Dougall, L. R., Anderson, J. G., Timoshkin, I. V., MacGregor, S. J. & Maclean, M.  
627 *Efficacy of antimicrobial 405 nm blue-light for inactivation of airborne bacteria* (Light-  
628 Based Diagnosis and Treatment of Infectious Diseases Ser. 10479, International  
629 Society for Optics and Photonics, 2018).

630

631

632 Ref3 = Nazari M, Xi M, Lerch S, Alizadeh MH, Ettinger C, Akiyama H, Gillespie C,  
633 Gummuluru S, Erramilli S, Reinhard BM, *Plasmonic Enhancement of Selective Photonic*  
634 *Virus Inactivation*. Scientific Reports, **7**, 11951 (2017).

635

636

637
